# Supplementary material
Source: publisher figshare collection journal article supplement (https://acs.figshare.com/ndownloader/files/3743311)

## Supplementary Content

Fig. S1. The  $^{13}\text{C}$  NMR (A) and  $^1\text{H}$  NMR (B) spectra of the carbohydrate produced from sucrose and lactose from the purified recombinant *L. mesenteroides* levansucrase.

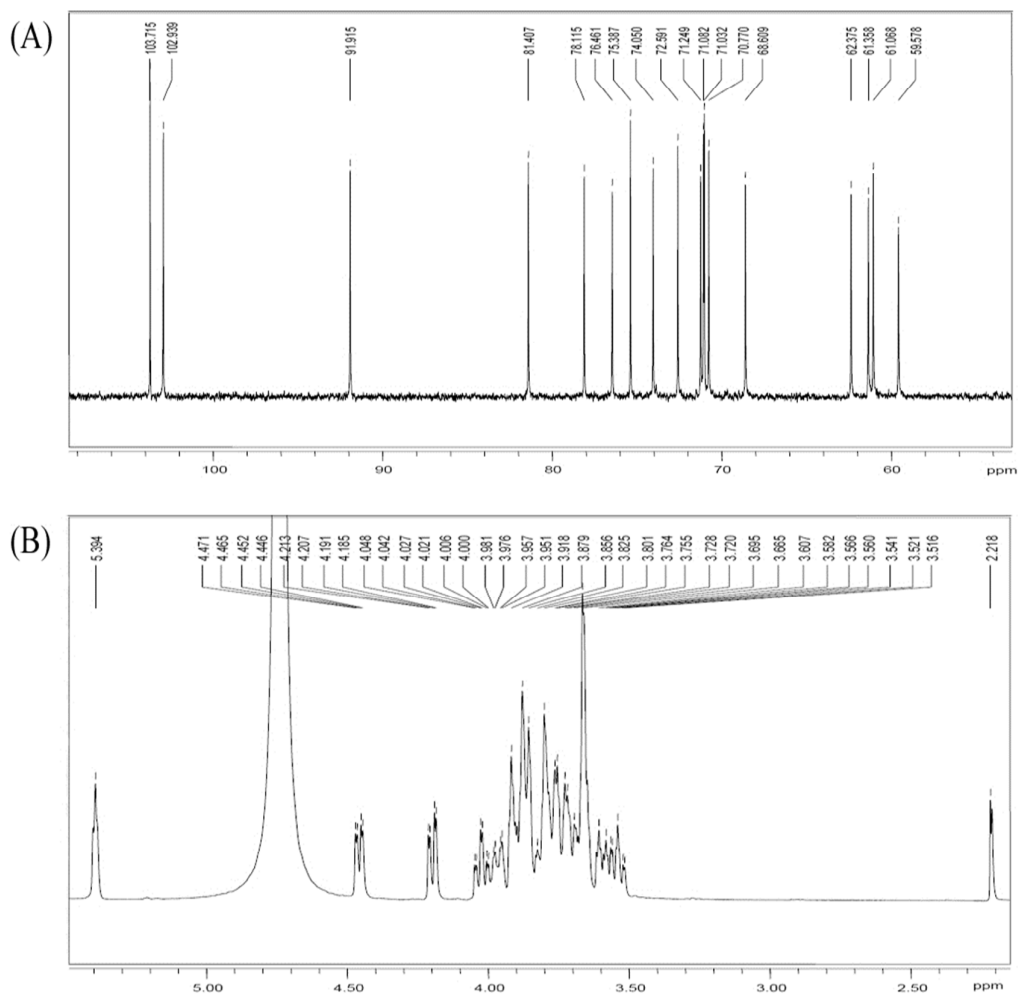

Fig. S2. The  $^1\text{H}$ - $^1\text{H}$  COSY (A) and  $^1\text{H}$ - $^{13}\text{C}$  HSQC (B) spectra of the carbohydrate produced from sucrose and lactose by the purified recombinant *L. mesenteroides* levansucrase.

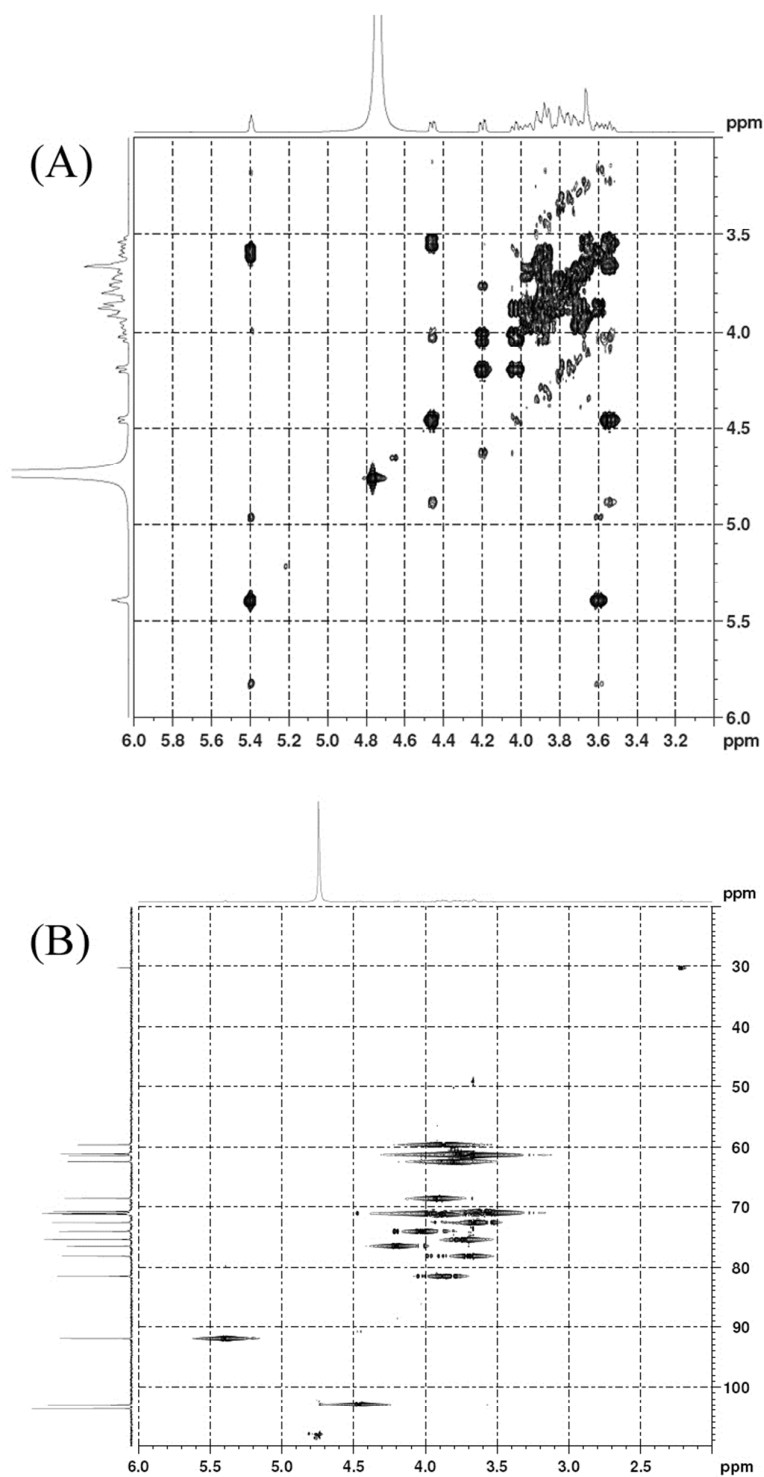

Supplement: Supplementary file 1 [file 3743311]
